# Supplementary material for: The ABCC6 Transporter as a Paradigm for Networking from an Orphan Disease to Complex Disorders
Source: Hindawi journal article supplement (doi:10.1155/2015/648569), 2015-01-01
Supplement: f1 [file 648569.f1.pdf]

|                       | <b>Missense variant</b> | <b>Gen Bank Accession No.</b> | <b>Model system</b>                                              | <b>TA</b> | <b>SCL</b> | <b>+</b> |
|-----------------------|-------------------------|-------------------------------|------------------------------------------------------------------|-----------|------------|----------|
| <b>Ilias et al.</b>   | p.V1298F                | AF076622                      | Sf9 insect cells                                                 | -         | NA         |          |
|                       | p.G1302R                |                               |                                                                  | -         | NA         |          |
|                       | p.G1321S                |                               |                                                                  | -         | NA         |          |
| <b>Le Saux et al.</b> | p.R1138Q                | NM_001171                     | Sf9 insect cells<br><br>Retroviral gene delivery in MDCKII cells | +         | -          |          |
|                       | p.V1298F                |                               |                                                                  | -         | +          |          |
|                       | p.R1314W                |                               |                                                                  | +         | -          |          |
|                       | p.G1321S                |                               |                                                                  | -         | -          |          |
|                       | p.R1339C                |                               |                                                                  | NA        | -          |          |
| <b>Pomozi et al.</b>  | p.R1114P                | NM_001171                     | Sf9 insect cells<br><br>Retroviral gene delivery in MDCKII cells | +         | +          | -        |
|                       | p.S1121W                |                               |                                                                  | +         | -          | -        |
|                       | p.R1138Q                |                               |                                                                  | +         | -          | -        |
|                       | p.V1298F                |                               |                                                                  | -         | +          | -        |
|                       | p.T1301I                |                               |                                                                  | +         | -          | -        |
|                       | p.R1314W                |                               |                                                                  | +         | -          | -        |
|                       | p.G1321S                |                               |                                                                  | -         | -          | -        |
|                       | p.R1339C                |                               |                                                                  | NA        | -          | -        |
|                       | p.Q1347H                |                               |                                                                  | +         | -          | -        |

|                     |          |           |  |    |   |    |
|---------------------|----------|-----------|--|----|---|----|
|                     | p.R1459C |           |  | +  | + | -  |
| <b>Uitto et al.</b> | p.P4H    | NM_001171 |  | NA | + | -  |
|                     | p.A9E    |           |  | NA | + | -  |
|                     | p.P21S   |           |  | NA | + | -  |
|                     | p.R64Q   |           |  | NA | + | +  |
|                     | p.E125K  |           |  | NA | + | -  |
|                     | p.R419Q  |           |  | NA | + | -  |
|                     | p.L605P  |           |  | NA | - | NA |
|                     | p.E709G  |           |  | NA | + | -  |
|                     | p.M834T  |           |  | NA | + | NA |
|                     | p.L948P  |           |  | NA | + | -  |
|                     | p.R1114P |           |  | NA | - | NA |

**Supplemental table 1. Missense variants in ABCC6 for which causality has been studied by *in vitro* and *in vivo* functional studies [19] [20] [21] [22].** SCL: subcellular localization, TA: transport activity, +: normal; -: abolished; ZF: zebrafish mRNA rescue experiment; NA: not available.
